# Supplementary material for: Long-term outcomes following severe COVID-19 infection: a propensity matched cohort study
Source: PubMed Central journal article supplement (PMC8663070; doi:10.1136/bmjresp-2021-001080), 2021-12-09
Supplement: bmjresp-2021-001080supp001.pdf [file bmjresp-2021-001080supp001.pdf]

**S1: Information on missing data, COVID-19 and non-COVID-19 cohorts**

|                                                                                                  | <b>COVID-19<br/>COHORT</b> | <b>NON COVID-<br/>19 COHORT</b> |
|--------------------------------------------------------------------------------------------------|----------------------------|---------------------------------|
| <b>Characteristic</b>                                                                            | n=93                       | n=206                           |
| <b>Gender, male (%)</b>                                                                          | 0 (0)                      | 1 (0.5)                         |
| <b>Age, median years (IQR)</b>                                                                   | 0 (0)                      | 1 (0.5)                         |
| <b>Obesity (%)</b>                                                                               | 0 (0)                      | 1 (0.5)                         |
| <b>Black and Minority Ethnic (%)</b>                                                             | 0 (0)                      | N/A                             |
| <b>Smoking (%)</b>                                                                               | 0 (0)                      | N/A                             |
| <b>Comorbidities:</b>                                                                            |                            |                                 |
| Hypertension (without complications) (%)                                                         | 0 (0)                      | 1 (0.5)                         |
| Cardiovascular disease (%)                                                                       | 0 (0)                      | 1 (0.5)                         |
| Respiratory disease (%)                                                                          | 1 (1.1)                    | 1 (0.5)                         |
| Endocrine (including diabetes) (%)                                                               | 0 (0)                      | 1 (0.5)                         |
| Liver (%)                                                                                        | 0 (0)                      | 1 (0.5)                         |
| Gastrointestinal (%)                                                                             | 0 (0)                      | 1 (0.5)                         |
| Mental Health (%)                                                                                | 0 (0)                      | 1 (0.5)                         |
| Presence of Multimorbidity (2 or more comorbidities) (%)                                         | 0 (0)                      | 0 (0)                           |
| <b>Hospital length of stay, median, days (IQR)</b>                                               | 12 (13)                    | 1 (0.5)                         |
| <b>Critical care length of stay, median, days (IQR)</b>                                          | 0 (0)                      | 1 (0.5)                         |
| <b>Acute Physiology and Chronic Health Evaluation II Score, median (IQR)</b>                     | 18 (19.3)                  | 3 (1.5)                         |
| <b>Invasive ventilation (%)</b>                                                                  | 1 (1.1)                    | 1 (0.5)                         |
| <b>Continuous Positive Airway Pressure ventilation (never received invasive ventilation) (%)</b> | 0 (0)                      | N/A                             |
| <b>Continuous Positive Airway pressure ventilation (also received invasive ventilation) (%)</b>  | 1 (1.1)                    | N/A                             |
| <b>Renal Replacement Therapy (%)</b>                                                             | 0 (0)                      | 1 (0.5)                         |
| <b>Advanced Cardiovascular Support (%)</b>                                                       | 0 (0)                      | 1 (0.5)                         |
| <b>Proned (%)</b>                                                                                | 1 (1.1)                    | N/A                             |
| <b>Socio-economic status: (SIMD category)</b>                                                    | 1 (1.1)                    | 1 (0.5)                         |
| <b>Employment status before admission:</b>                                                       | 3 (3.2)                    | N/A                             |
| <b>EQ-5D-5L (Health Utility)</b>                                                                 | 2 (2.2)                    | 15 (7.3)                        |
| <b>EQ-ED-EL (VAS)</b>                                                                            | 2 (2.2)                    | 24 (11.7)                       |
| <b>HADS (Depression)</b>                                                                         | 1 (1.1)                    | 1 (0.5)                         |
| <b>HADS (Anxiety)</b>                                                                            | 0 (0)                      | 1 (0.5)                         |
