# Supplementary material for: Long-term outcomes following severe COVID-19 infection: a propensity matched cohort study
Source: PubMed Central journal article supplement (PMC8663070; doi:10.1136/bmjresp-2021-001080), 2021-12-09
Supplement: bmjresp-2021-001080supp002.pdf [file bmjresp-2021-001080supp002.pdf]

S2

Interpretation of HADS score (Zigmond and Snaith 1983)

| <b>Score</b> | <b>Interpretation</b> |
|--------------|-----------------------|
| <b>0-7</b>   | Normal                |
| <b>8-10</b>  | Mild                  |
| <b>11-14</b> | Moderate              |
| <b>15-21</b> | Severe                |
