# Supplementary material for: Long-term outcomes following severe COVID-19 infection: a propensity matched cohort study
Source: PubMed Central journal article supplement (PMC8663070; doi:10.1136/bmjresp-2021-001080), 2021-12-09

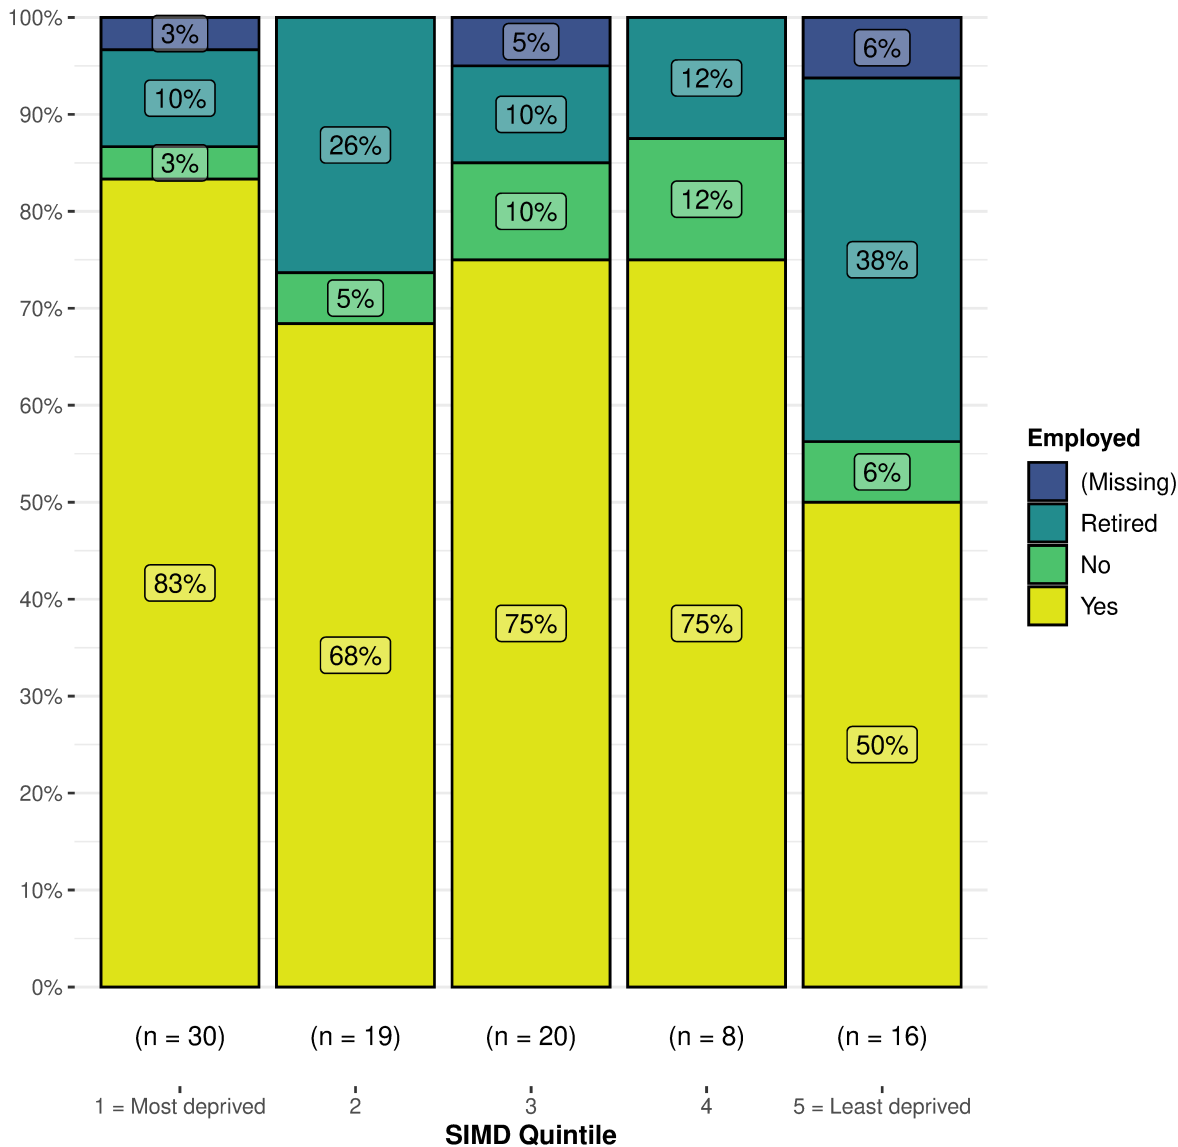

Supplement: bmjresp-2021-001080supp004.pdf [file bmjresp-2021-001080supp004.pdf]
