# Supplementary material for: Long-term outcomes following severe COVID-19 infection: a propensity matched cohort study
Source: PubMed Central journal article supplement (PMC8663070; doi:10.1136/bmjresp-2021-001080), 2021-12-09
Supplement: bmjresp-2021-001080supp005.pdf [file bmjresp-2021-001080supp005.pdf]

S5

Logistic Regression Model: Failure to Return to Employment (n=67)

| <b>Variable</b>                                      | <b>Adjusted Odds Ratio (95% CI)</b> | <b>p value</b> |
|------------------------------------------------------|-------------------------------------|----------------|
| <b>SIMD 1 (Reference)</b>                            | 1                                   |                |
| SIMD 2                                               | 0.66 (0.14-3.14)                    | 0.61           |
| SIMD 3                                               | 2.05 (0.41-10.30)                   | 0.39           |
| SIMD 4                                               | 0.22 (0.02-2.63)                    | 0.24           |
| SIMD 5 (Least Deprived)                              | 0.06 (0.00-0.76)                    | <b>0.03</b>    |
| Multimorbidity (presence of 2 or more comorbidities) | 1.13 (0.27-4.82)                    | 0.87           |
| Critical care length of stay                         | 1.05 (0.99-1.10)                    | 0.07           |
| Age                                                  | 1.06 (0.99-1.12)                    | 0.08           |
| Follow-up time (days)                                | 0.99 (0.97-1.00)                    | 0.08           |
