# Supplementary material for: Long-term outcomes following severe COVID-19 infection: a propensity matched cohort study
Source: PubMed Central journal article supplement (PMC8663070; doi:10.1136/bmjresp-2021-001080), 2021-12-09
Supplement: bmjresp-2021-001080supp006.pdf [file bmjresp-2021-001080supp006.pdf]

**S6: Matched, Unadjusted and Adjusted Modelling outputs (COVID-19 vs non-COVID-19 cohorts)**EQ-5D-5L Health Utility Score (Linear Regression)

| Variable                                            | Unadjusted Estimate<br>(95% CI) | P value          | Adjusted Estimate<br>(95% CI)  | P value      |
|-----------------------------------------------------|---------------------------------|------------------|--------------------------------|--------------|
| Cohort difference                                   | 0.09 (-0.005-0.18)              | 0.06             | 0.08 (-0.005-0.17)             | <b>0.06</b>  |
| Age (Years)                                         | 0.002 (-0.002-0.006)            | 0.24             | 0.001 (-0.004-0.006)           | 0.66         |
| Gender (Male)                                       | 0.03 (-0.06-0.13)               | 0.51             | 0.006 (-0.09-0.10)             | 0.90         |
| ICU Length of Stay                                  | -0.002(-0.005-0.001)            | 0.20             | -0.001 (-0.004-0.002)          | 0.34         |
| APACHE II                                           | 0.005 (-0.004-0.013)            | 0.26             | 0.006 (-0.004-0.016)           | 0.24         |
| Obesity                                             | -0.09 (-0.191-0.007)            | 0.70             | -0.037 (-0.14-0.067)           | 0.48         |
| Follow-up time                                      | -0.0004 (-0.001-0.000)          | <b>0.03</b>      | -0.0002(-0.006-0.001)          | 0.17         |
| SIMD 2                                              | -0.04 (-0.17-0.09)              | 0.57             | -0.03 (-0.158-0.09)            | 0.58         |
| SIMD 3                                              | 0.062 (-0.06-0.18)              | 0.32             | 0.08 (-0.03-0.21)              | 0.14         |
| SIMD 4                                              | 0.12 (-0.04-0.29)               | 0.13             | 0.12 (-0.03-0.28)              | 0.12         |
| SIMD 5                                              | 0.13 (-0.006-0.27)              | 0.06             | 0.096 (-0.036-0.229)           | 0.15         |
| Presence of one comorbidity                         | -0.007 (-0.13-0.12)             | 0.92             | -0.029 (-0.160-0.101)          | 0.66         |
| Presence of two or more comorbidities               | -0.04 (-0.15-0.06)              | 0.44             | -0.09 (-0.199-0.021)           | 0.11         |
| Previous Mental Health problems (pre critical care) | <b>-0.22 (-0.34- -0.01)</b>     | <b>&lt;0.001</b> | <b>-0.191 (-0.319- -0.162)</b> | <b>0.004</b> |

EQ-5D-5L Visual Analogue Scale (Linear Regression)

| Variable                                            | Unadjusted Estimate<br>(95% CI) | P value      | Adjusted Estimate<br>(95% CI) | P value      |
|-----------------------------------------------------|---------------------------------|--------------|-------------------------------|--------------|
| Cohort difference                                   | 4.67 (-1.83-11.17)              | 0.16         | 4.73 (-1.12-11.28)            | <b>0.16</b>  |
| Age (Years)                                         | 0.08 (-0.19-0.36)               | 0.55         | -0.02 (-0.33-0.31)            | 0.92         |
| Gender (Male)                                       | 2.86 (-3.82-9.55)               | 0.40         | 0.76 (-6.13-7.66)             | 0.83         |
| ICU Length of Stay                                  | -0.03 (-0.24-0.19)              | 0.81         | 0.02 (-0.18-0.23)             | 0.84         |
| APACHE II                                           | 0.32 (-0.27-0.91)               | 0.29         | 0.41 (-0.29-1.10)             | 0.25         |
| Obesity                                             | -6.73 (-13.6-0.13)              | 0.05         | -4.03 (-11.16-3.1)            | 0.27         |
| Follow-up time                                      | -0.007 (-0.03-0.02)             | 0.61         | 0.002 (-0.02-0.03)            | 0.86         |
| SIMD 2                                              | -1.4(-10.73-7.93)               | 0.77         | -0.84 (-10.05-8.36)           | 0.86         |
| SIMD 3                                              | 2.49 (-6.34-11.33)              | 0.58         | 4.55 (-4.25-13.36)            | 0.31         |
| SIMD 4                                              | 1.34 (-10.39-13.07)             | 0.82         | 0.87 (-10.72-12.46)           | 0.88         |
| SIMD 5                                              | 9.75 (-0.07-19.57)              | 0.05         | 7.96 (-1.72-17.63)            | 0.11         |
| Presence of one comorbidity                         | -1.63 (-10.53-7.28)             | 0.72         | -3.43 (-12.75-5.89)           | 0.47         |
| Presence of two or more comorbidities               | -2.77 (-10.46-4.93)             | 0.48         | -5.40 (-13.56-2.76)           | 0.19         |
| Previous Mental Health problems (pre critical care) | <b>-15.57 (-24.7- -6.44)</b>    | <b>0.001</b> | <b>-14.71 (-24.32- -5.10)</b> | <b>0.003</b> |

## Hospital Anxiety and Depression Scale- Anxiety Component (Linear Regression)

| Variable                                            | Unadjusted Estimate<br>(95% CI) | P value          | Adjusted Estimate<br>(95% CI) | P value       |
|-----------------------------------------------------|---------------------------------|------------------|-------------------------------|---------------|
| Cohort difference                                   | -0.30 (-1.99-1.38)              | 0.72             | -0.07 (-1.162-1.48)           | <b>0.93</b>   |
| Age (Years)                                         | <b>-0.13 (-0.19- -0.06)</b>     | <b>&lt;0.001</b> | <b>-0.08 (-0.15- -0.002)</b>  | <b>0.05</b>   |
| Gender (Male)                                       | <b>-1.78 (-3.48- -0.09)</b>     | <b>0.04</b>      | <b>-1.02 (-2.65-0.61)</b>     | <b>0.21</b>   |
| ICU Length of Stay                                  | -0.03 (-0.08-0.03)              | 0.35             | -0.03 (-0.08-0.02)            | 0.26          |
| APACHE II                                           | <b>-0.22 (-0.37- -0.07)</b>     | <b>0.005</b>     | -0.15 (-0.31-0.01)            | 0.07          |
| Obesity                                             | 0.92 (-0.85-2.68)               | 0.31             | 0.24 (-1.50-1.98)             | 0.79          |
| Follow-up time                                      | 0.004 (-0.002-0.01)             | 0.19             | 0.003 (-0.003-0.009)          | 0.35          |
| SIMD 2                                              | 0.45 (-1.90-2.80)               | 0.70             | 0.14 (-1.98-2.26)             | 0.90          |
| SIMD 3                                              | -1.37 (-3.61-0.86)              | 0.23             | -2.05 (-4.08- -0.011)         | 0.05          |
| SIMD 4                                              | -1.30 (-4.26-1.67)              | 0.39             | -1.04 (-3.76-1.68)            | 0.45          |
| SIMD 5                                              | <b>-2.89 (-5.41- -0.37)</b>     | <b>0.03</b>      | -2.05 (-4.34-0.24)            | 0.08          |
| Presence of one comorbidity                         | -1.41 (-3.57-0.74)              | 0.20             | 0.29 (-1.88-2.45)             | 0.79          |
| Presence of two or more comorbidities               | -1.40 (-3.33-0.53)              | 0.15             | 0.36 (-1.56-2.28)             | 0.71          |
| Previous Mental Health problems (pre critical care) | <b>4.68 (2.49-6.87)</b>         | <b>&lt;0.001</b> | <b>4.14 (1.94-6.34)</b>       | <b>0.0003</b> |

## Hospital Anxiety and Depression Scale- Depression Component (Linear Regression)

| Variable                                            | Unadjusted Estimate<br>(95% CI) | P value          | Adjusted Estimate<br>(95% CI) | P value          |
|-----------------------------------------------------|---------------------------------|------------------|-------------------------------|------------------|
| Cohort difference                                   | -1.28 (-2.76-0.20)              | 0.09             | -1.09 (-2.43-0.25)            | <b>0.11</b>      |
| Age (Years)                                         | <b>-0.07 (-0.13- -0.01)</b>     | <b>0.03</b>      | -0.03 (-0.01-0.03)            | 0.31             |
| Gender (Male)                                       | -1.07 (-2.56-0.42)              | 0.16             | -0.34 (-1.79-1.10)            | 0.64             |
| ICU Length of Stay                                  | -0.01 (-0.06-0.04)              | 0.59             | -0.03 (-0.07-0.02)            | 0.25             |
| APACHE II                                           | <b>-0.16 (-0.29- -0.03)</b>     | <b>0.02</b>      | -0.15 (-0.30-0.004)           | 0.06             |
| Obesity                                             | 1.30 (-0.32-2.92)               | 0.12             | 0.43 (-1.12-1.98)             | 0.58             |
| Follow-up time                                      | 0.006 (0-0.011)                 | 0.05             | 0.003 (-0.002-0.008)          | 0.22             |
| SIMD 2                                              | 0.04 (-2.06-2.14)               | 0.97             | -0.19 (-2.03-1.65)            | 0.83             |
| SIMD 3                                              | -0.57 (-2.54-1.40)              | 0.57             | -1.21 (-2.97-0.54)            | 0.17             |
| SIMD 4                                              | -0.64 (-3.29-2.0)               | 0.63             | -0.56 (-2.99-1.87)            | 0.65             |
| SIMD 5                                              | <b>-2.58 (-4.82- -0.35)</b>     | <b>0.02</b>      | -1.97 (-3.97-0.04)            | 0.05             |
| Presence of one comorbidity                         | 0.55 (-1.43-2.53)               | 0.59             | 1.62 (-0.26-3.51)             | 0.09             |
| Presence of two or more comorbidities               | 0.26 (-1.48-1.99)               | 0.77             | 1.51 (-0.16-3.19)             | 0.08             |
| Previous Mental Health problems (pre critical care) | <b>5.22 (3.27-7.17)</b>         | <b>&lt;0.001</b> | <b>4.97 (2.90-7.05)</b>       | <b>&lt;0.001</b> |

## EQ-5D-5L: Pain analysis (Logistic Regression) \*

| Variable                                            | Unadjusted Estimate (95% CI) | P value | Adjusted Estimate (95% CI) | P value     |
|-----------------------------------------------------|------------------------------|---------|----------------------------|-------------|
| Cohort difference                                   | 0.04 (-0.66-0.75)            | 0.90    | 0.038 (-0.74-0.82)         | <b>0.92</b> |
| Age (Years)                                         | -0.02 (-0.04-0.01)           | 0.31    | -0.02 (-0.06-0.02)         | 0.33        |
| Gender (Male)                                       | -0.06 (-0.74-0.73)           | 0.99    | 0.01 (-0.82-0.85)          | 0.98        |
| ICU Length of Stay                                  | 0.02 (-0.002-0.04)           | 0.08    | 0.02 (-0.01-0.004)         | 0.14        |
| APACHE II                                           | -0.02 (-0.08-0.05)           | 0.65    | -0.01 (-0.11-0.08)         | 0.77        |
| Obesity                                             | 0.54 (-0.21-1.28)            | 0.16    | 0.28 (-0.60-1.15)          | 0.53        |
| Follow-up time                                      | 0.002 (-0.001-0.004)         | 0.20    | 0.01 (-0.001-0.004)        | 0.37        |
| SIMD 2                                              | 0.20 (-0.75-1.15)            | 0.68    | 0.23 (-0.76-1.23)          | 0.64        |
| SIMD 3                                              | -0.74 (-1.78-0.30)           | 0.16    | -0.95 (-2.09-0.20)         | 0.10        |
| SIMD 4                                              | -0.69 (-2.08-0.69)           | 0.33    | -0.62 (-2.08-0.84)         | 0.40        |
| SIMD 5                                              | -0.64 (-1.78-0.5)            | 0.27    | -0.49 (-1.7-0.73)          | 0.43        |
| Presence of one comorbidity                         | 0.02 (-1.02-1.06)            | 0.97    | 0.12 (-1.08-1.32)          | 0.84        |
| Presence of two or more comorbidities               | 0.38 (-0.45-1.20)            | 0.37    | 0.69 (-0.30-1.68)          | 0.17        |
| Previous Mental Health problems (pre critical care) | 0.66 (-0.23-1.55)            | 0.15    | 0.54 (-0.48-1.57)          | 0.30        |

\*dichotomised at severe pain and above in the EQ-5D-5L scale
