# Supplementary material for: Long-term outcomes following severe COVID-19 infection: a propensity matched cohort study
Source: BMJ Open Respir Res. 2021 Dec 9;8(1):e001080. doi: 10.1136/bmjresp-2021-001080 (PMC8663070; doi:10.1136/bmjresp-2021-001080)
Supplement: Supplementary data [file bmjresp-2021-001080supp003.pdf]

S3

Characteristics of study participants and those patients who were invited, but did not attend  
InS:PIRE

| Characteristic                                   | InS:PIRE cohort<br>(n=93) | Invited, but did not<br>attend<br>(n=76) |
|--------------------------------------------------|---------------------------|------------------------------------------|
| Gender, male (%)                                 | 61 (65.6)                 | 51 (67.1)                                |
| Age, year, median (IQR)                          | 59 (54-67)                | 53 (45-60)                               |
| Critical Care Length of Stay, days, median (IQR) | 11.1 (5-25.3)             | 3.9 (2.3-9.2)                            |
| Socio-economic status: SIMD category:            |                           |                                          |
| 1 (most deprived)                                | 30 (32.3)                 | 31 (40.8)                                |
| 2                                                | 19 (20.4)                 | 15 (19.7)                                |
| 3                                                | 20 (20.5)                 | 12 (15.8)                                |
| 4                                                | 8 (8.6)                   | 8 (10.5)                                 |
| 5 (least deprived)                               | 16 (17.2)                 | 10 (13.2)                                |
| APACHE II, median (IQR)                          | 15 (10-20)                | 13.5 (9-16)                              |
